# Supplementary material
Source: PubMed Central journal article supplement (PMC1805596)
Supplement: pnas_0608232104_6.pdf [file pnas_0608232104_6.pdf]

**Table 1.** Proteins aggregated upon DnaK and DnaJ depletion in a *secB* null background.

| Name/ Function <sup>a</sup> |                                                       | Mw<br>(kDa) | DnaK/DnaJ<br>depleted<br>(4) <sup>b</sup> | <i>secB</i> null<br>(5) <sup>c</sup> | Localization   | Swiss-<br>Prot/TrEMBL<br>entry |
|-----------------------------|-------------------------------------------------------|-------------|-------------------------------------------|--------------------------------------|----------------|--------------------------------|
| <b>IbpB*</b>                | Chaperone                                             | 16          | +                                         | +                                    | Cytoplasm      | P0C059                         |
| <b>IbpA*</b>                | Chaperone                                             | 16          | +                                         | +                                    | Cytoplasm      | P0C055                         |
| <b>OmpX</b>                 | Outer membrane protein X                              | 19          | -                                         | +                                    | Outer membrane | P0A919                         |
| <b>S3</b>                   | 30S ribosomal protein                                 | 26          | -                                         | -                                    | Cytoplasm      | P0A7V5                         |
| <b>OmpA</b>                 | Outer membrane protein A                              | 37          | -                                         | +                                    | Outer membrane | P0A911                         |
| <b>PhoE</b>                 | Outer membrane protein E                              | 39          | -                                         | -                                    | Outer membrane | Q8CWC3                         |
| <b>OmpC</b>                 | Outer membrane protein C                              | 40          | -                                         | -                                    | Outer membrane | P06996                         |
| <b>EF-Tu</b>                | Elongation factor Tu                                  | 43          | +                                         | -                                    | Cytoplasm      | P0A6N3                         |
| <b>MurA</b>                 | UDP-N-acetylglucosamine<br>1-carboxylvinyltransferase | 45          | +                                         | -                                    | Cytoplasm      | Q8X9J9                         |
| <b>ClpX*</b>                | Chaperone                                             | 47          | +                                         | -                                    | Cytoplasm      | P0A6H3                         |
| <b>Rho</b>                  | Transcriptional terminator                            | 47          | +                                         | -                                    | Cytoplasm      | P0AG32                         |
| <b>Gnd</b>                  | Gluconate-6-phosphate dehydrogenase                   | 48          | +                                         | -                                    | Cytoplasm      | Q5JBG2                         |
| <b>HflX</b>                 | GTP-binding protein                                   | 49          | -                                         | -                                    | Cytoplasm      | P25519                         |
| <b>AtpD</b>                 | ATP synthase subunit beta                             | 50          | -                                         | -                                    | Cytoplasm      | P0ABB6                         |
| <b>AccC</b>                 | Biotin carboxylase                                    | 50          | -                                         | -                                    | Cytoplasm      | Q8X9B6                         |
| <b>LpdA</b>                 | Dihydrolipoamide dehydrogenase                        | 51          | +                                         | -                                    | Cytoplasm      | P0A9P2                         |
| <b>GroEL*</b>               | Chaperone                                             | 57          | -                                         | -                                    | Cytoplasm      | Q6UDB5                         |
| <b>PyrG</b>                 | CTP synthase                                          | 61          | +                                         | -                                    | Cytoplasm      | P0A7E7                         |
| <b>TypA</b>                 | GTP-binding protein                                   | 68          | +                                         | -                                    | Cytoplasm      | P0A3B2                         |
| <b>NuoC</b>                 | NADH-quinone oxidoreductase                           | 69          | -                                         | -                                    | Cytoplasm      | P33599                         |
| <b>FtsH*</b>                | ATP-dependent protease                                | 71          | -                                         | -                                    | Inner membrane | Q8X9L0                         |
| <b>ThrS</b>                 | Threonyl-tRNA synthase                                | 75          | +                                         | -                                    | Cytoplasm      | Q8XE27                         |
| <b>EF-G</b>                 | Elongation factor G                                   | 78          | +                                         | -                                    | Cytoplasm      | P0A6N0                         |
| <b>PflB</b>                 | Formate acetyltransferase 1                           | 85          | +                                         | -                                    | Cytoplasm      | P09373                         |
| <b>Lon*</b>                 | ATP-dependent protease                                | 88          | +                                         | -                                    | Cytoplasm      | P0A9M1                         |
| <b>YaeT</b>                 | Outer membrane protein assembly factor                | 91          | -                                         | -                                    | Outer membrane | P0A942                         |
| <b>AdhE</b>                 | Aldehyde-alcohol dehydrogenase                        | 96          | +                                         | -                                    | Cytoplasm      | P0A9Q8                         |
| <b>AceE</b>                 | Pyruvate dehydrogenase E1 component                   | 99          | +                                         | -                                    | Cytoplasm      | P0AFG9                         |
| <b>TrcF</b>                 | Transcription-repair coupling factor                  | 130         | +                                         | -                                    | Cytoplasm      | P30958                         |
| <b>NarG</b>                 | Nitrate reductase                                     | 141         | +                                         | -                                    | Cytoplasm      | P09152                         |
| <b>RpoB</b>                 | RNA polymerase                                        | 151         | +                                         | -                                    | Cytoplasm      | P0A8V4                         |
| <b>RpoC</b>                 | RNA polymerase                                        | 156         | +                                         | -                                    | Cytoplasm      | Q8FB83                         |

<sup>a</sup> Proteins found in the aggregated fraction after 3 h of DnaK and DnaJ depletion in the *secB* null strain background at 30°C (as presented in Fig. 4C, line 3). Proteins are listed according to their sizes in kDa. The protein bands present in the aggregates were excised from the Coomassie Blue-stained SDS-polyacrylamide gels and protein species were identified by peptide mass fingerprinting as described (6). Proteins marked with the symbol (\*) are either chaperones or proteases which most likely co-aggregate with unfolded substrates (4).

<sup>b</sup> Aggregated proteins that were (+), or were not (-) previously identified upon DnaK and DnaJ depletion at 37°C in a SecB<sup>+</sup> background (4).

<sup>c</sup> Aggregated proteins that were (+), or were not (-) previously identified in a *secB* null mutant background at 37°C in the presence of endogenous DnaK and DnaJ (5).
