# Supplementary material
Source: PubMed Central journal article supplement (PMC1805596)

wild type

*secA51*

*secA51 Δtig*

*secAcsR11*

*secAcsR11 Δtig*

*secY40*

*secY40 Δtig*

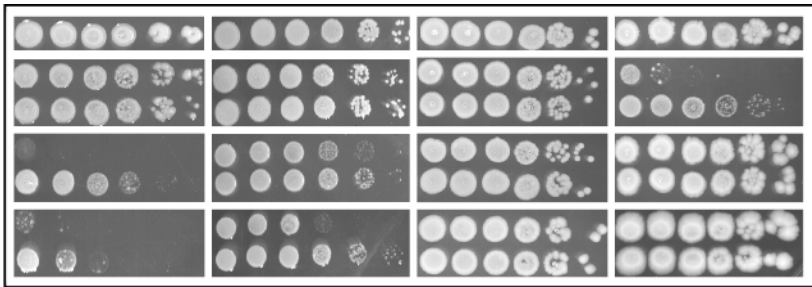

16°C

18°C

30°C

36°C

Supplement: pnas_0608232104_1.pdf [file pnas_0608232104_1.pdf]

# DnaK DnaJ depletion

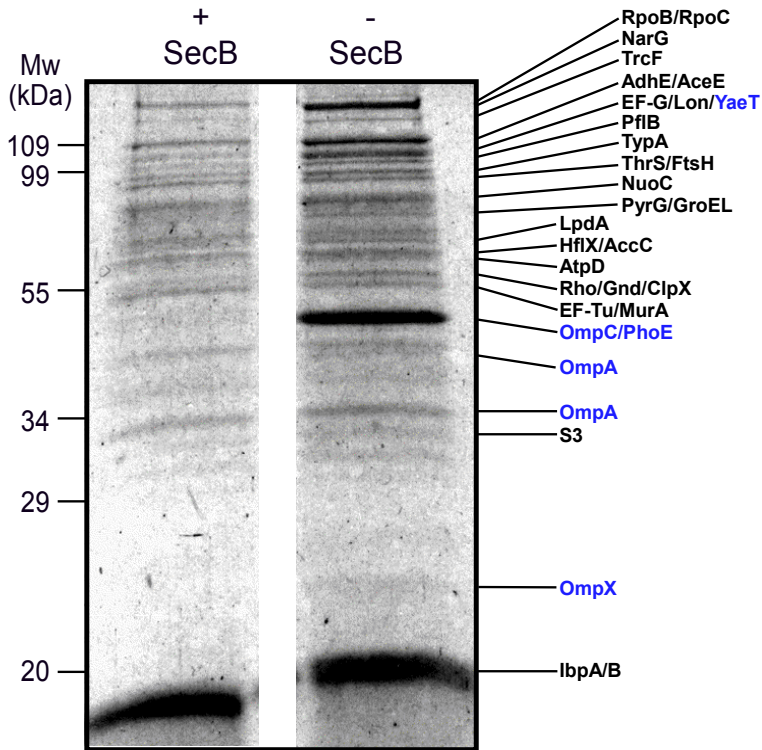

Supplement: pnas_0608232104_2.pdf [file pnas_0608232104_2.pdf]

wild type  
 $\Delta$ tig

wild type  
 $\Delta$ tig

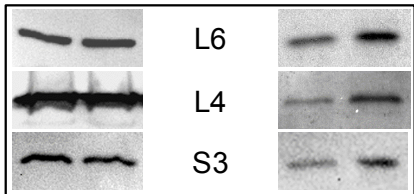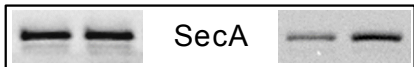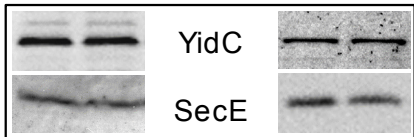

whole cells

inner  
membranes

Supplement: pnas_0608232104_3.pdf [file pnas_0608232104_3.pdf]

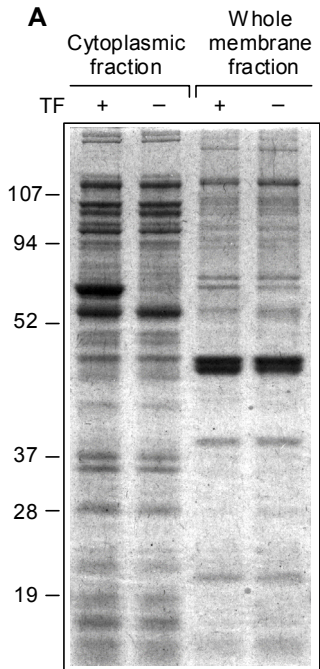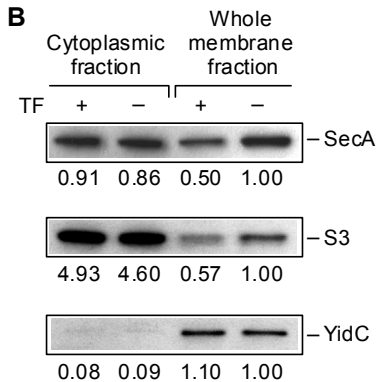

Supplement: pnas_0608232104_4.pdf [file pnas_0608232104_4.pdf]

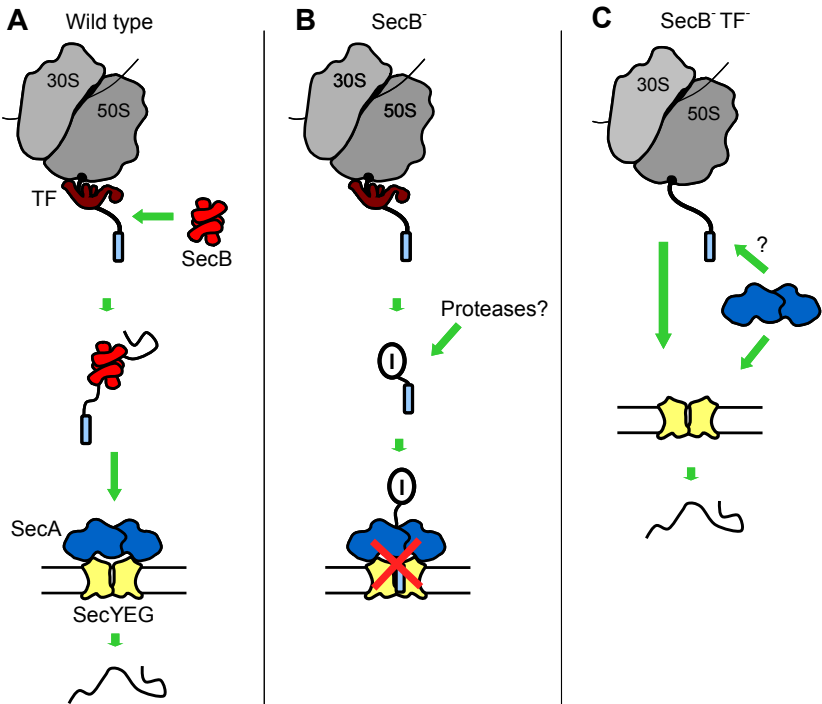

Supplement: pnas_0608232104_5.pdf [file pnas_0608232104_5.pdf]
